# Supplementary material
Source: PubMed Central journal article supplement (PMC6303180)
Supplement: supp_6.4.E664_2018-0029-original-submission.pdf [file supp_6.4.E664_2018-0029-original-submission.pdf]

## Epidemiology of Primary Biliary Cholangitis in Canada

3 Epidemiology and Liver Transplantation Burden of Primary Biliary Cholangitis: A  
4 Retrospective Cohort Study Using National Administrative Data

5 **A manuscript submitted to the Canadian Medical Association Journal for Open**

6 **Access publication**

7 **Date: July 5, 2018**

8 **Author List:**

9 Eric M Yoshida<sup>1</sup>, Andrew Mason<sup>2</sup>, Kevork M Peltekian<sup>3</sup>, Hemant Shah<sup>4</sup>, Sherri  
10 Thiele<sup>5</sup>, Richard Borrelli<sup>5</sup>, Aren Fischer<sup>5</sup>

11 <sup>1</sup>University of British Columbia, Vancouver, British Columbia

12 <sup>2</sup>University of Alberta, Edmonton, Alberta

13 <sup>3</sup>Dalhousie University and Queen Elizabeth II Health Sciences Centre, Division of  
14 Digestive Care & Endoscopy, Halifax, Nova Scotia

15 <sup>4</sup>University of Toronto, Toronto, Ontario

16 <sup>5</sup>QuintilesIMS

17 **Corresponding Author:**

18 Mr. Aren Fischer

19 6700 Century Avenue, Suite 300

20 Mississauga, ON, Canada, L5N 6A4

21 +1-(905) 816-5062 / +1-(416) 294-5795

22 [Aren.Fischer@ca.imsbrogan.com](mailto:Aren.Fischer@ca.imsbrogan.com)

23 **Funding and Disclosures**

24 Aren Fischer, Sherri Thiele and Richard Borrelli are employees of IQVIA  
25 (formerly QuintilesIMS) and have contributed to this study as consultants paid by

## Epidemiology of Primary Biliary Cholangitis in Canada

27 Intercept Pharmaceuticals. This study was supported by funding from Intercept  
28 Pharmaceuticals.

29 Dr. Eric Yoshida has been an investigator of clinical trials sponsored by  
30 Intercept, Gilead Sciences, Merck Inc, Janssen Inc, Addvie Inc, Genfit Inc,  
31 Springbank Inc. He has received honoraria for CME/Ad Board lectures from Gilead  
32 Sciences Canada, Merck Canada, Abbvie Canada and Celgene Canada.

33 **Main Body Word Count:** 2445

34 **List of Abbreviations:**

|               |                                                    |
|---------------|----------------------------------------------------|
| PBC           | Primary Biliary Cholangitis                        |
| ICD Diagnosis | International Classification of Diseases Diagnosis |
| MELD Score    | Model of End-Stage Liver Disease                   |

36 **Number of Tables and Figures:**

|                |   |
|----------------|---|
| <b>Figures</b> | 1 |
| <b>Tables</b>  | 3 |

38 **ABSTRACT**

39 ***Background & Aims:***

40 There is a wealth of data documenting the epidemiology of primary biliary cholangitis  
41 (PBC) globally; however, no recent assessment of PBC epidemiology in Canada.

42 Global data suggests the prevalence of PBC is a growing healthcare concern. To  
43 investigate these trends, our study characterized the Canadian prevalence of PBC and  
44 the number of liver transplantations due to PBC.

45 ***Methods:***

46 Hospital administrative records with national coverage from the Canadian Institute for  
47 Health Information (in-patient, ambulatory, outpatient), with the exception of Quebec,

1  
2  
3 48 and British Columbia transplant data, were used for the study. Patients were identified  
4  
5 49 by ICD-10 PBC diagnosis.

6  
7 50 **Results:**

8  
9 51 In 2015, 8,680 PBC patients were identified in Canada, translating to a prevalence of  
10  
11 52 318 cases per million. Annual prevalence by province varied, ranging from 283 to 465  
12  
13 53 (95% CI 275-309, 426-504) cases per million, and the 6-year PBC liver transplant rate  
14  
15 54 ranged from 3.17 to 5.92 (95% CI 1.27-6.54, 3.71-9.08) per million. The Atlantic  
16  
17 55 Provinces exhibited the highest PBC prevalence, and close to the highest 6-year liver  
18  
19 56 transplant rate per million [465 and 5.70 cases per million (95% CI 426-504, 3.19-  
20  
21 57 9.56) respectively]. We observed the lowest PBC prevalence and the second lowest 6-  
22  
23 58 year liver transplant rate in Ontario [283 and 3.37 cases per million (95% CI 269-297,  
24  
25 59 2.47-4.50) respectively].

26  
27  
28  
29 60 **Interpretation:**

30  
31 61 Our study demonstrates the prevalence of PBC in Canada is similar to other PBC  
32  
33 62 prevalence studies. Due to geographic clustering of PBC across the Canadian  
34  
35 63 Provinces, we hypothesize that PBC pathogenesis is linked to environmental and  
36  
37 64 genetic factors.

38  
39 65 **Key Words:** Primary Biliary Cholangitis, Prevalence, Liver Transplant

40  
41  
42 66 **INTRODUCTION**

43  
44 67 Primary biliary cholangitis (PBC) is a chronic rare autoimmune cholestatic  
45  
46 68 liver disease characterized by destruction of the small intrahepatic bile ducts. It  
47  
48 69 predominantly affects middle-aged and elderly women.(1, 2) Despite its rarity, PBC is  
49  
50 70 an important cause of liver related morbidity.(2-5) In the US the annual economic  
51  
52 71 burden of PBC has been estimated to be \$69-115 million.(3) There is concern that the  
53  
54  
55  
56  
57  
58  
59  
60

## Epidemiology of Primary Biliary Cholangitis in Canada

1  
2  
3 72 increasing incidence and prevalence;(6-12) however, with improved treatment  
4  
5 73 options, these costs may be attenuated.(13-15) The epidemiology of PBC was first  
6  
7 74 described as early as 40 years ago,(16) although decades later no study has  
8  
9 75 investigated the national prevalence of PBC in Canada. It predominantly affects  
10  
11 76 middle-aged and elderly women.(1, 2) A number of studies have examined the  
12  
13 77 epidemiology of PBC globally, illustrating considerable variability in the prevalence  
14  
15 78 ranging from 6.7 to 402 cases per million, while incidence rates range from 0.7 to 58  
16  
17 79 cases per million.(1) A growing number of studies suggest the incidence and  
18  
19 80 prevalence of PBC is increasing.(6-12) The driver of this growth remains unclear, but  
20  
21 81 may be the result of an increase in incidence, longer survival, as well as advances in  
22  
23 82 diagnosis and treatment. In addition, there is increasing evidence to suggest PBC  
24  
25 83 etiology is related to complex interactions between genetic predisposition and  
26  
27 84 environmental triggers,(3, 17-21) such as infectious disease agents.(3, 22-24)(25)

30  
31 85 Recent advances in the understanding of PBC provide the opportunity to  
32  
33 86 improve patient outcomes and to lower the economic and epidemiologic burden of  
34  
35 87 PBC. In this study our primary objective was to provide a national prevalence  
36  
37 88 estimate of PBC in Canada, as well as to investigate the regional PBC prevalence by  
38  
39 89 geographic areas across Canada. Our secondary objective was to characterize liver  
40  
41 90 transplantation trends and geographic distribution in PBC patients, since this is a  
42  
43 91 costly procedure, and a proportion of PBC patients require liver transplants.

## 92 **METHODS**

### 93 **Data sources and study population:**

50  
51 94 The study used patient-level records over a 9-year period from April 1, 2007  
52  
53 95 to March 31, 2015 for the prevalent population, and over a 6-year period from April 1,  
54  
55 96 2010 to March 31, 2015 for the liver transplant population. This study sourced data

## Epidemiology of Primary Biliary Cholangitis in Canada

1  
2  
3 97 across three databases from the Canadian Institute for Health Information (CIHI). The  
4  
5 98 National Ambulatory Care Reporting System (NACRS) database contains data on  
6  
7 99 hospital and community-based emergency and ambulatory care visits, including visits  
8  
9 100 to day surgery, and outpatient clinics in Canada.<sup>(36)</sup> The Discharge Abstract Database  
10  
11 101 (DAD) contains data on hospitalizations from acute inpatient care, select day surgery,  
12  
13 102 chronic, rehabilitation and psychiatric institutions in Canada.<sup>(37)</sup> The Canadian Organ  
14  
15 103 Replacement Register (CORR) records information on all transplanted organs across  
16  
17 104 Canada.<sup>(38)</sup> Data from 9 of 10 provinces in Canada, with the exception of Quebec,  
18  
19 105 was made available for the prevalence estimate, and 8 of 10 provinces in Canada, with  
20  
21 106 the exception of British Columbia and Quebec, for the transplant analysis. For the  
22  
23 107 provinces with incomplete data coverage or unreleased data we extrapolated results  
24  
25 108 from the other provinces by applying age adjusted prevalence or transplant rates to the  
26  
27 109 known populations within those provinces as reported by Statistics Canada.<sup>(39)</sup> To  
28  
29 110 capture diagnoses made in clinics the authors used the available data from Alberta to  
30  
31 111 estimate diagnoses in other provinces. Data of individual provinces were then grouped  
32  
33 112 into geographic regions: Atlantic (Nova Scotia, New Brunswick, Prince Edward  
34  
35 113 Island, and Newfoundland), Ontario, Prairies (Manitoba and Saskatchewan), Alberta,  
36  
37 114 and British Columbia. Ethics approval for this study was obtained from Institutional  
38  
39 115 Review Board Services (Pro00017376).

**116 Administrative data case definition:**

117 PBC case identification for the prevalent population required one hospital visit  
118 with a diagnosis code for PBC (International Classification of Diseases Version 10-  
119 Canadian Edition K74.3) recorded as the most responsible reason for a visit, or as a  
120 comorbidity diagnosis during the study period. In all study databases unique patient  
121 identifiers were used to prevent double counting patients. Similar to previous

## Epidemiology of Primary Biliary Cholangitis in Canada

1  
2  
3 122 studies,(2, 4, 5) PBC case identification for the liver transplant population required  
4  
5 123 the primary reason for the transplant to be PBC.

6  
7 124 **Liver disease severity indexes:**

8  
9 125 Alberta patients were further identified as late-stage PBC if their medical  
10  
11 126 records included at least one late-stage PBC associated diagnosis. The list of  
12  
13 127 diagnosis codes associated with late-stage PBC were generated using published  
14  
15 128 literature, (18, 34, 40) and expert clinical opinion(41). This additional analysis was  
16  
17 129 limited to Alberta as it was the only province with full coverage of outpatient clinics  
18  
19 130 and hospital visits required for a robust determination of late-stage disease.

20  
21  
22 131 For the liver transplant population, the Model for End Stage Liver Disease  
23  
24 132 (MELD) and Child Pugh score were used as a measure of prognostic survival, liver  
25  
26 133 disease severity, and are traditionally used to determine liver transplant priority.(42)  
27  
28 134 MELD score uses the patient's values for serum bilirubin, serum creatinine and the  
29  
30 135 International normalized ratio for prothrombin time.(43) The Child Pugh score  
31  
32 136 employs five clinical measures of liver disease namely: total bilirubin, serum albumin,  
33  
34 137 prothrombin time, ascites and hepatic encephalopathy. Each measure is scored  
35  
36 138 between 1 and 3, with 3 indicating most severe condition.(42)

37  
38  
39 139 **Statistical analysis:**

40  
41 140 The prevalence estimate was evaluated between April 1, 2013 and March 31,  
42  
43 141 2015 for the prevalent population, and April 1, 2010 to March 31, 2015 for the liver  
44  
45 142 transplant population. The annual prevalence was determined by dividing the number  
46  
47 143 of PBC cases alive at March 31 for each year by the populations for each geographic  
48  
49 144 area from Statistics Canada. Due to the disease's chronic nature, patients were  
50  
51 145 considered prevalent with PBC until a hospital death occurred. Our study used all  
52  
53 146 available history in the look-back period to establish prevalence. For geographic

1  
2  
3 147 distribution in the PBC liver transplant population, a 6-year liver transplant rate per  
4  
5 148 million estimate was used to account for low annual transplant rates. Regional  
6  
7 149 estimates were age and sex adjusted to the 2015 and 2013 Canadian population for the  
8  
9 150 prevalent and liver transplant population, respectively.(44) Wait-time for liver  
10  
11 151 transplantation was defined as the number of days from the date that the patient was  
12  
13 152 placed on the transplant list to the date of liver transplant. Patients who died while on  
14  
15 153 the transplant list were not included in CORR and therefore unavailable for analysis.  
16  
17 154 Descriptive statistics were used to summarize the characteristics of the study cohorts.  
18  
19 155 P-values between prevalence estimates were calculated using the two-sided Wilson  
20  
21 156 method with a continuity correction. The Kaplan-Meier method was used to assess  
22  
23 157 transplant wait-time and survival.  
24  
25

## 26 158 **RESULTS**

### 27 159 **National Prevalence of PBC:**

30  
31  
32 160 In 2015, 8,680 cases of PBC patients were identified in Canada, excluding  
33  
34 161 Quebec, which translates into a prevalence of 318 (95% CI 309-327) cases per  
35  
36 162 million, Table 1). Geographic analysis revealed variance in the prevalence of PBC  
37  
38 163 across the Canadian provinces. In 2015, Atlantic Provinces had the highest PBC  
39  
40 164 prevalence (465 [95% CI: 426-504] cases per million) in Canada, followed by the  
41  
42 165 Prairie Provinces (399 [95% CI: 360-438] cases per million), British Columbia (327  
43  
44 166 [95% CI: 302-352] cases per million), then Alberta (292 [95% CI 275-309] cases per  
45  
46 167 million). The lowest prevalence PBC rate was observed in Ontario, (283 [95% CI:  
47  
48 168 269-297] cases per million) (Table 1). Relative to Ontario, the Atlantic Provinces  
49  
50 169 (p<0.01), Prairie Provinces (p<0.01), and British Columbia (p<0.05) had a  
51  
52 170 significantly higher PBC prevalence. However, Alberta was not statistically different  
53  
54 171 from Ontario (p=0.4).  
55  
56  
57  
58  
59  
60

## Epidemiology of Primary Biliary Cholangitis in Canada

1  
2  
3 172 The demographic characteristics of the PBC population are shown in Table 2.  
4  
5 173 PBC was approximately five times as common among females in our study  
6  
7 174 population . The majority of PBC cases were diagnosed among individuals 40-64  
8  
9 175 years of age for women, and among 0-17 years of age for men. Disease severity  
10  
11 176 varied by province. Of the Alberta PBC patients, 29% (95% CI: 26%-32%) were  
12  
13 177 identified as having late-stage PBC due to a late-stage associated diagnosis. Further  
14  
15 178 segmenting the population by treatment location, 8% (95% CI 6%-10%) of PBC  
16  
17 179 treated only in a clinic were identified as late-stage, while 48% (95% CI 44%-53%) of  
18  
19 180 patients who received a PBC diagnosis in the hospital were considered late-stage.

**181 National liver transplantation for PBC:**

22  
23  
24  
25 182 A total of 92 patients received a liver transplant due to PBC between April 1,  
26  
27 183 2010 and March 31, 2015 in Canada (excluding Quebec, British Columbia),  
28  
29 184 accounting for 5% of all liver transplants in this time frame. The annual rate of liver  
30  
31 185 transplants due to PBC varied and ranged from 0.49 to 1.03 cases per million in the  
32  
33 186 general population (Table 1). The geographic analysis showed that the 6-year liver  
34  
35 187 transplant rate per million due to PBC was highest in Alberta (5.92 [95% CI: 3.71-  
36  
37 188 9.08] cases per million) followed by the Atlantic Provinces (5.70 [95% CI: 3.19-9.56]  
38  
39 189 cases per million), then Ontario (3.37 [95% CI: 2.47-4.50] cases per million). The  
40  
41 190 lowest 6-year liver transplant rate per million due to PBC was observed in the Prairie  
42  
43 191 Provinces (3.17 [95% CI: 1.27-6.54] cases per million). Relative to Ontario, Alberta  
44  
45 192 (p<0.05) had a significantly higher 6-year PBC liver transplant rate per million.  
46  
47 193 However, the Atlantic (p=0.1) and Prairie (p=1) provinces were not statistically  
48  
49 194 different from Ontario.

52  
53 195 Liver transplants were approximately 5 times more common among females  
54  
55 196 than among males, which aligns with findings with the PBC prevalence analysis.



1  
2  
3 197 Further, PBC was the leading cause of liver transplantation among  
4  
5 198 males and females in this study, the highest number of liver transplants was observed  
6  
7 199 in patients between the ages of 40-64 (Table 3). Close to half of PBC liver transplant  
8  
9 200 patients have the most severe liver dysfunction measured by a Child Pugh score of 10-  
10  
11 201 15 (58%) and MELD score of >22 (39%) (Table 3).

12  
13  
14 202 When analyzing wait times to receive a transplant, the median wait time for  
15  
16 203 PBC patients was 2 months (95% CI: 1-3) (Figure 1). Post-transplant, the 2-year  
17  
18 204 survival for PBC patients was estimated to be 89% (95% CI: 83%-96%) (Figure 1).

## 20 205 **INTERPRETATION**

21  
22  
23 206 This study improves upon previous studies estimating the regional or local  
24  
25 207 prevalence of PBC by describing the first national epidemiological trends of PBC and  
26  
27 208 associated liver transplants in and across Canada. This study found that the annual  
28  
29 209 prevalence varied by province from 283 to 465 (95% CI 275-309, 426-504) cases per  
30  
31 210 million, and the 6-year PBC liver transplant count ranged from 3.17 to 5.92 (95% CI  
32  
33 211 1.27-6.54, 3.71-9.08) per million. The last time prevalence of PBC in the United  
34  
35 212 States was published was for the period of 1975-1995.(9) Previous prevalence studies  
36  
37 213 of PBC show a wide range of estimates ranging from 6.7 to 402 per million.(1, 7, 9-  
38  
39 214 12, 16, 45) The PBC prevalence figures reported in this study (2015 prevalence of 318  
40  
41 215 per million) are among the highest reported, and when projected nationally to  
42  
43 216 extrapolate for the Quebec population, correspond to 11,290 prevalent PBC cases in  
44  
45 217 Canada in 2015. Earlier, Canadian studies(11, 12) have reported prevalence estimates  
46  
47 218 of between 3 and 25 per million, an order of magnitude lower than the current study.  
48  
49 219 The most recent Canadian estimate by Myers and colleagues reported a 2002  
50  
51 220 prevalence of 227 per million(10) which is consistent with our estimate for the PBC  
52  
53 221 prevalence in the province of Alberta (292 per million).

## Epidemiology of Primary Biliary Cholangitis in Canada

1  
2  
3 222 There are several potential contributing factors to the increase in PBC  
4  
5 223 prevalence. It is possible greater disease awareness and testing, earlier diagnosis, or  
6  
7 224 prolonged survival could each contribute. Several studies on the temporal trends of  
8  
9 225 liver transplants and outcomes of PBC patients suggest prolonged survival may be a  
10  
11 226 key factor.(9, 33, 46, 47) Lee and colleagues described a reduction in the number of  
12  
13 227 transplantations for PBC patients thought to be attributed to the introduction of  
14  
15 228 ursodeoxycholic acid (UDCA), indicating possible improved outcomes and therefore  
16  
17 229 prolonged survival.(9, 33, 48)

18  
19  
20 230 The current study provides the first analysis of clustering effects of PBC  
21  
22 231 across Canada. Our geographic analysis showed large disparities in the PBC  
23  
24 232 prevalence across Canadian provinces ranging from 283 to 465 per million for the  
25  
26 233 prevalence analysis, and 3.17 to 5.92 liver transplants per million in the general  
27  
28 234 population for the liver transplant analysis. Notably, the Atlantic Provinces had high  
29  
30 235 PBC prevalence (465 per million) and 6-year PBC liver transplant rate per million  
31  
32 236 (5.7 per million). This geographic clustering of PBC may suggest genetic and  
33  
34 237 environmental influences on the aetiology and pathogenesis of PBC. In particular,  
35  
36 238 these patterns could potentially be explained by the founder effect. A large percentage  
37  
38 239 of the Atlantic populations are descendent of immigrants from the British Isles and  
39  
40 240 Northern France. Approximately 29% of Newfoundland and Labrador's, 19% of  
41  
42 241 PEI's, 16% of Nova Scotia's, and 12% of New Brunswick's population are descended  
43  
44 242 solely from the United Kingdom, with even higher proportions having some United  
45  
46 243 Kingdom descent.(49) In comparison, only 9% of the Ontario population, the  
47  
48 244 Canadian province with the lowest estimated PBC prevalence, is solely from the  
49  
50 245 United Kingdom.(49) A systematic review by Boonstra *et al.* found that the United  
51  
52 246 Kingdom population has one of the highest PBC prevalence.(1)

1  
2  
3 247 Literature suggests that PBC is typically considered a disease of middle  
4  
5 248 age,(11, 12) and our results echoed the same findings. Out of the total study  
6  
7 249 population, approximately 55% of patients were found to be PBC prevalent within the  
8  
9 250 age group of 40-59 years.(49) Liver transplantation survival rates for PBC patients in  
10  
11 251 the present analysis (2-year survival: 89%) is comparable to the CORR annual report  
12  
13 252 (5-year survival: 81.8%). Fosby and colleagues observed a similar PBC liver  
14  
15 253 transplant survival rate in Nordic countries between 2004 and 2013, with the 1-year  
16  
17 254 and 5-year survival for patients transplanted for PBC reported to be 94% and 87%,  
18  
19  
20 255 respectively.(4)

21  
22  
23 256 As our study has several limitations due to the challenges inherent in using  
24  
25 257 administrative datasets, we recommend careful interpretation of results. Our study is  
26  
27 258 potentially limited by the risk of misclassification of individuals with PBC due to  
28  
29 259 reliance on administrative data. The definition used by Myers and colleagues required  
30  
31 260 two distinct diagnoses of PBC and was shown to have a positive predictive value  
32  
33 261 (PPV) of 73% for definite or probable PBC cases(51); therefore, we can expect our  
34  
35 262 PPV value would be lower based on a single PBC diagnosis in this study. Second, the  
36  
37 263 data coverage for the DAD and NACRS (emergency department) database was not  
38  
39  
40 264 complete across the provinces. However, the number of PBC patients identified  
41  
42 265 through the ER was small (5%), hence we consider this adjustment was minor. For  
43  
44 266 clinic visits, we used Alberta, which had 100% clinic coverage, to project for lack of  
45  
46 267 visibility in other provinces. We observed 58% the PBC population is identified  
47  
48 268 through the clinic, and therefore this part of the projection had a greater impact on the  
49  
50  
51 269 prevalence estimate.

52  
53 270 In conclusion, using population-based administrative data we have provided  
54  
55 271 insight into the geographic distribution and temporal trends of PBC in Canada for

## Epidemiology of Primary Biliary Cholangitis in Canada

272 both the PBC prevalent and liver transplant population. Notwithstanding the  
 273 limitations outlined above, the observed prevalence demonstrate that PBC is a  
 274 growing healthcare concern in Canada, and warrants further investigations of the  
 275 interplay between genetic and environmental influences on PBC disease.

**REFERENCES**

- 276 1. Boonstra K, Beuers U, Ponsioen CY. Epidemiology of primary sclerosing  
 277 cholangitis and primary biliary cirrhosis: a systematic review. *J Hepatol.*  
 278 2012;56(5):1181-8.
- 279 2. Prince M, Chetwynd, A., Newman, W., Metcalf, J. V. & James, O. F. Survival  
 280 and symptom progression in a geographically based cohort of patients with primary  
 281 biliary cirrhosis: follow-up for up to 28 years. *Gastroenterology.* 2002;123:1044-51.
- 282 3. Gershwin ME, Selmi C, Worman HJ, Gold EB, Watnik M, Utts J, et al. Risk  
 283 factors and comorbidities in primary biliary cirrhosis: a controlled interview-based  
 284 study of 1032 patients. *Hepatology.* 2005;42(5):1194-202.
- 285 4. Neuberger J. Recurrent primary biliary cirrhosis. *Liver Transpl.* 2003;9:539-  
 286 46.
- 287 5. Fosby B, Melum E, Bjoro K, Bennet W, Rasmussen A, Andersen IM, et al.  
 288 Liver transplantation in the Nordic countries - An intention to treat and post-transplant  
 289 analysis from The Nordic Liver Transplant Registry 1982-2013. *Scand J*  
 290 *Gastroenterol.* 2015;50(6):797-808.
- 291 6. Charatcharoenwitthaya P, Pimentel S, Talwalkar JA, Enders FT, Lindor KD,  
 292 Krom RA, et al. Long-term survival and impact of ursodeoxycholic acid treatment for  
 293 recurrent primary biliary cirrhosis after liver transplantation. *Liver Transpl.*  
 294 2007;13(9):1236-45.
- 295 7. Hurlburt KJ, McMahon BJ, Deubner H, Hsu-Trawinski B, Williams JL,  
 296 Kowdley KV. Prevalence of autoimmune liver disease in Alaska Natives. *Am J*  
 297 *Gastroenterol.* 2002;97(9):2402-7.
- 298 8. James OF, Bhopal R, Howel D, Gray J, Burt AD, Metcalf JV. Primary biliary  
 299 cirrhosis once rare, now common in the United Kingdom? *Hepatology.*  
 300 1999;30(2):390-4.
- 301 9. Kim WR, Lindor KD, Locke GR, 3rd, Therneau TM, Homburger HA, Batts  
 302 KP, et al. Epidemiology and natural history of primary biliary cirrhosis in a US  
 303 community. *Gastroenterology.* 2000;119(6):1631-6.
- 304 10. Myers RP, Shaheen AA, Fong A, Burak KW, Wan A, Swain MG, et al.  
 305 Epidemiology and natural history of primary biliary cirrhosis in a Canadian health  
 306 region: a population-based study. *Hepatology.* 2009;50(6):1884-92.
- 307 11. Villeneuve JP FD, Infante-Rivard C. Descriptive epidemiology of primary  
 308 biliary cirrhosis in the province of Quebec. *Can J Gastroenterol.* 1991;5:174-8.
- 309 12. Witt-Sullivan H, Heathcote J, Cauch K, Blendis L, Ghent C, Katz A, et al. The  
 310 demography of primary biliary cirrhosis in Ontario, Canada. *Hepatology.*  
 311 1990;12(1):98-105.
- 312 13. Lee YM, Kaplan MM. Efficacy of colchicine in patients with primary biliary  
 313 cirrhosis poorly responsive to ursodiol and methotrexate. *Am J Gastroenterol.*  
 314 2003;98(1):205-8.

- 1  
2  
3 315 14. Nevens F, Andreone P, Mazzella G, Strasser SI, Bowlus C, Invernizzi P, et al.  
4 316 A Placebo-Controlled Trial of Obeticholic Acid in Primary Biliary Cholangitis. *N*  
5 317 *Engl J Med*. 2016;375(7):631-43.
- 6 318 15. Carey EJ, Ali AH, Lindor KD. Primary biliary cirrhosis. *Lancet*.  
7 319 2015;386(10003):1565-75.
- 8 320 16. Hamlyn AN, Sherlock S. The epidemiology of primary biliary cirrhosis: a  
9 321 survey of mortality in England and Wales. *Gut*. 1974;15(6):473-9.
- 10 322 17. McNally RJ, James PW, Ducker S, Norman PD, James OF. No rise in  
11 323 incidence but geographical heterogeneity in the occurrence of primary biliary  
12 324 cirrhosis in North East England. *Am J Epidemiol*. 2014;179(4):492-8.
- 13 325 18. Leung PS, Chuang DT, Wynn RM, Cha S, Danner DJ, Ansari A, et al.  
14 326 Autoantibodies to BCOADC-E2 in patients with primary biliary cirrhosis recognize a  
15 327 conformational epitope. *Hepatology*. 1995;22(2):505-13.
- 16 328 19. Kimura Y, Selmi C, Leung PS, Mao TK, Schauer J, Watnik M, et al. Genetic  
17 329 polymorphisms influencing xenobiotic metabolism and transport in patients with  
18 330 primary biliary cirrhosis. *Hepatology*. 2005;41(1):55-63.
- 19 331 20. Cordell HJ, Han Y, Mells GF, Li Y, Hirschfield GM, Greene CS, et al.  
20 332 International genome-wide meta-analysis identifies new primary biliary cirrhosis risk  
21 333 loci and targetable pathogenic pathways. *Nat Commun*. 2015;6:8019.
- 22 334 21. Ala A, Stanca CM, Bu-Ghanim M, Ahmado I, Branch AD, Schiano TD, et al.  
23 335 Increased prevalence of primary biliary cirrhosis near Superfund toxic waste sites.  
24 336 *Hepatology*. 2006;43(3):525-31.
- 25 337 22. Prince MI, Ducker SJ, James OF. Case-control studies of risk factors for  
26 338 primary biliary cirrhosis in two United Kingdom populations. *Gut*. 2010;59(4):508-  
27 339 12.
- 28 340 23. Corpechot C, Chretien Y, Chazouilleres O, Poupon R. Demographic, lifestyle,  
29 341 medical and familial factors associated with primary biliary cirrhosis. *J Hepatol*.  
30 342 2010;53(1):162-9.
- 31 343 24. Zein CO, Beatty K, Post AB, Logan L, Debanne S, McCullough AJ. Smoking  
32 344 and increased severity of hepatic fibrosis in primary biliary cirrhosis: A cross  
33 345 validated retrospective assessment. *Hepatology*. 2006;44(6):1564-71.
- 34 346 25. Mason AL, Zhang G. Linking human beta retrovirus infection with primary  
35 347 biliary cirrhosis. *Gastroenterol Clin Biol*. 2010;34(6-7):359-66.
- 36 348 26. Wang J, Yang G, Dubrovsky AM, Choi J, Leung PS. Xenobiotics and loss of  
37 349 tolerance in primary biliary cholangitis. *World J Gastroenterol*. 2016;22(1):338-48.
- 38 350 27. Danielsson A, Boqvist L, Uddenfeldt P. Epidemiology of primary biliary  
39 351 cirrhosis in a defined rural population in the northern part of Sweden. *Hepatology*.  
40 352 1990;11(3):458-64.
- 41 353 28. Tsuji K, Watanabe Y, Van De Water J, Nakanishi T, Kajiyama G, Parikh-  
42 354 Patel A, et al. Familial primary biliary cirrhosis in Hiroshima. *J Autoimmun*.  
43 355 1999;13(1):171-8.
- 44 356 29. Bach N, Schaffner F. Familial primary biliary cirrhosis. *J Hepatol*.  
45 357 1994;20(6):698-701.
- 46 358 30. Hirschfield GM, Liu X, Xu C, Lu Y, Xie G, Lu Y, et al. Primary biliary  
47 359 cirrhosis associated with HLA, IL12A, and IL12RB2 variants. *N Engl J Med*.  
48 360 2009;360(24):2544-55.
- 49 361 31. Mells GF, Floyd JA, Morley KI, Cordell HJ, Franklin CS, Shin SY, et al.  
50 362 Genome-wide association study identifies 12 new susceptibility loci for primary  
51 363 biliary cirrhosis. *Nat Genet*. 2011;43(4):329-32.
- 52 364 32. Prince MI, Chetwynd A, Craig WL, Metcalf JV, James OF. Asymptomatic

## Epidemiology of Primary Biliary Cholangitis in Canada

- 1  
2  
3 365 primary biliary cirrhosis: clinical features, prognosis, and symptom progression in a  
4 366 large population based cohort. *Gut*. 2004;53(6):865-70.  
5 367 33. Lee J, Belanger A, Doucette JT, Stanca C, Friedman S, Bach N.  
6 368 Transplantation trends in primary biliary cirrhosis. *Clin Gastroenterol Hepatol*.  
7 369 2007;5(11):1313-5.  
8 370 34. Lindor KD, Gershwin ME, Poupon R, Kaplan M, Bergasa NV, Heathcote EJ,  
9 371 et al. Primary biliary cirrhosis. *Hepatology*. 2009;50(1):291-308.  
10 372 35. Sclair SN, Little E, Levy C. Current Concepts in Primary Biliary Cirrhosis and  
11 373 Primary Sclerosing Cholangitis. *Clin Transl Gastroenterol*. 2015;6:e109.  
12 374 36. Informatics CIHI. National Ambulatory Care Reporting System Annual  
13 375 Report. 2016.  
14 376 37. Information CIHI. Discharge Abstract Database Annual Report. 2016.  
15 377 38. Information. CIHI. Canadian Organ Replacement Register Report. 2016.  
16 378 39. Canada S. Estimates of population, by age group and sex - TABLE 051-001.  
17 379 2016.  
18 380 40. Carey EJ, Ali, A. H. & Lindor, K. D. Primary biliary cirrhosis. *Lancet*.  
19 381 2015;386:1565-75.  
20 382 41. Desai S, Peltekian KM. Canadian mortality rates for liver disease: taking a  
21 383 closer look at ICD coding. *Can J Public Health*. 2004;95(3):198-200.  
22 384 42. Chaurasia RK, Pradhan B, Chaudhary S, Jha SM. Child-Turcotte-Pugh versus  
23 385 model for end stage liver disease score for predicting survival in hospitalized patients  
24 386 with decompensated cirrhosis. *J Nepal Health Res Council*. 2013;11(23):9-16.  
25 387 43. Chawla YK, Kashinath RC, Duseja A, Dhiman RK. Predicting Mortality  
26 388 Across a Broad Spectrum of Liver Disease-An Assessment of Model for End-Stage  
27 389 Liver Disease (MELD), Child-Turcotte-Pugh (CTP), and Creatinine-Modified CTP  
28 390 Scores. *J Clin Exp Hepatol*. 2011;1(3):161-8.  
29 391 44. Canada S. Life tables, Canada, provinces and territories. Available at:  
30 392 <http://www.statcan.ca/pub/84-537-x/84-537-x2013005-eng.htm>. Accessed November  
31 393 2016.  
32 394 45. Delgado J, Sperber AD, Novack V, Delgado B, Edelman L, Gaspar N, et al.  
33 395 The epidemiology of primary biliary cirrhosis in southern Israel. *Isr Med Assoc J*.  
34 396 2005;7(11):717-21.  
35 397 46. Gross RG, Odin JA. Recent advances in the epidemiology of primary biliary  
36 398 cirrhosis. *Clin Liver Dis*. 2008;12(2):289-303; viii.  
37 399 47. Chuang N, Gross RG, Odin JA. Update on the epidemiology of primary  
38 400 biliary cirrhosis. *Expert Rev Gastroenterol Hepatol*. 2011;5(5):583-90.  
39 401 48. Borman M, & Swain, Mark G. Changing epidemiology and natural history of  
40 402 primary biliary cirrhosis. *Clinical Liver Disease*. 2014;3(1):12-4.  
41 403 49. Information CIHI. Canadian Organ Replacement Registry Annual Report.  
42 404 2017.  
43 405 50. Kuiper EM, Hansen BE, Metselaar HJ, de Man RA, Haagsma EB, van Hoek  
44 406 B, et al. Trends in liver transplantation for primary biliary cirrhosis in the Netherlands  
45 407 1988-2008. *BMC Gastroenterol*. 2010;10:144.  
46 408 51. Myers RP, Shaheen AA, Fong A, Wan AF, Swain MG, Hilsden RJ, et al.  
47 409 Validation of coding algorithms for the identification of patients with primary biliary  
48 410 cirrhosis using administrative data. *Can J Gastroenterol*. 2010;24(3):175-82.



**Table 1. Annual Prevalence Among Primary Biliary Cholangitis (PBC) and PBC Liver Transplant Population**

| Year | Prevalence (95% CI)      |                                 |
|------|--------------------------|---------------------------------|
|      | PBC Prevalent Population | PBC Liver Transplant Population |
| 2010 | -                        | 1.03 (0.93-1.06)                |
| 2011 | -                        | 0.55 (0.37-0.73)                |
| 2012 | -                        | 1.02 (0.92-1.11)                |
| 2013 | 255 (248-264)            | 0.59 (0.47-0.71)                |
| 2014 | 288 (279-297)            | 0.58 (0.52-0.65)                |
| 2015 | 318 (309-327)            | 0.49 (0.41-1.06)                |

Note: CI = confidence interval. Data shows national annual prevalence trend with the age/sex adjusted prevalence as PBC or Liver Transplant cases per million population.

**Table 2. Demographics the Primary Biliary Cholangitis Prevalent Population**

| Age Group | Male (%) | Female (%) |
|-----------|----------|------------|
| 0-17      | 62%      | 38%        |
| 18-39     | 35%      | 65%        |
| 40-64     | 20%      | 80%        |
| 65-79     | 22%      | 78%        |
| >80+      | 17%      | 83%        |

Note: CI = confidence interval. The data show the proportion of the 2015 PBC prevalent population.

**Table 3. Demographics and Disease Severity of the Primary Biliary Cholangitis Liver Transplant Population**

| Age                 | Male (%)                | Female (%) |
|---------------------|-------------------------|------------|
| 0-17                | 4%                      | 0%         |
| 18-39               | 0%                      | 11%        |
| 40-64               | 60%                     | 83%        |
| 65+                 | 36%                     | 6%         |
| Child Pugh Category | Proportion Patients (%) |            |
| 5-6                 | 0%                      |            |
| 7-9                 | 41%                     |            |
| 10-15               | 58%                     |            |
| MELD Category       | Proportion Patients (%) |            |
| <12                 | 7%                      |            |
| 12-15               | 24%                     |            |
| 15-22               | 29%                     |            |
| >22                 | 39%                     |            |

Note: MELD = model of end-stage liver disease. The data are show the crude unadjusted counts for the liver transplant population by age. The data show the 2010-2015 PBC liver transplant study cohort with the distribution of patients' liver disease severity as measured by Child Pugh and MELD Score.

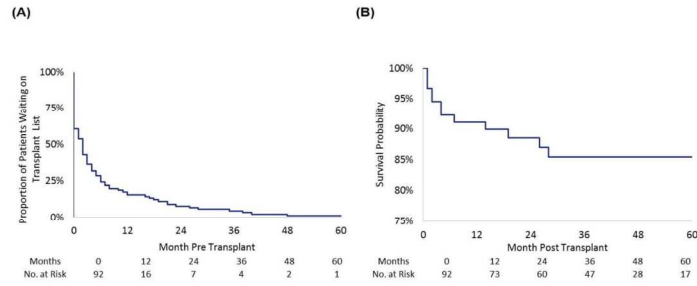

**Figure 1: Primary Biliary Cholangitis Liver Transplant Wait-time and Survival Analysis**

A) Transplant Wait-Time Analysis. The data shown is the proportion of patients waiting to receive a liver transplant by month since being listed on the transplant list. B) Survival Post Liver Transplant. The data shown demonstrates the probability of survival post-liver transplant by month.

Primary Biliary Cholangitis Liver Transplant Wait-time and Survival Analysis

599x776mm (72 x 72 DPI)
