# Supplementary material
Source: PubMed Central journal article supplement (PMC6303180)
Supplement: supp_6.4.E664_strobe-checklist.pdf [file supp_6.4.E664_strobe-checklist.pdf]

## STROBE Checklist

**Manuscript title:** Epidemiology and Liver Transplantation Burden of Primary Biliary Cholangitis in Canada: A Retrospective Cohort Study Using National Administrative Data

STROBE Statement—checklist of items that should be included in reports of observational studies

| Criteria                  | Item No | Recommendation                                                                                                                                                                                                                                                                                                                                                                                                                                                         | Page (Main Document)                                         |
|---------------------------|---------|------------------------------------------------------------------------------------------------------------------------------------------------------------------------------------------------------------------------------------------------------------------------------------------------------------------------------------------------------------------------------------------------------------------------------------------------------------------------|--------------------------------------------------------------|
| Title and abstract        | 1       | (a) Indicate the study's design with a commonly used term in the title or the abstract                                                                                                                                                                                                                                                                                                                                                                                 | Pg.1                                                         |
|                           |         | (b) Provide in the abstract an informative and balanced summary of what was done and what was found                                                                                                                                                                                                                                                                                                                                                                    | Pg.2-3, line 38-64                                           |
| <b>Introduction</b>       |         |                                                                                                                                                                                                                                                                                                                                                                                                                                                                        |                                                              |
| Background/rationale      | 2       | Explain the scientific background and rationale for the investigation being reported                                                                                                                                                                                                                                                                                                                                                                                   | Pg.4-5, line 75-110                                          |
| Objectives                | 3       | State specific objectives, including any prespecified hypotheses                                                                                                                                                                                                                                                                                                                                                                                                       | Pg.4-5, line 106-110                                         |
| <b>Methods</b>            |         |                                                                                                                                                                                                                                                                                                                                                                                                                                                                        |                                                              |
| Study design              | 4       | Present key elements of study design early in the paper                                                                                                                                                                                                                                                                                                                                                                                                                | Pg.5-8, line 111-173                                         |
| Setting                   | 5       | Describe the setting, locations, and relevant dates, including periods of recruitment, exposure, follow-up, and data collection                                                                                                                                                                                                                                                                                                                                        | Pg.5-6, line 112-139                                         |
| Participants              | 6       | (a) <i>Cohort study</i> —Give the eligibility criteria, and the sources and methods of selection of participants. Describe methods of follow-up<br><i>Case-control study</i> —Give the eligibility criteria, and the sources and methods of case ascertainment and control selection. Give the rationale for the choice of cases and controls<br><i>Cross-sectional study</i> —Give the eligibility criteria, and the sources and methods of selection of participants | Pg.5-6, line 112-139                                         |
|                           |         | (b) <i>Cohort study</i> —For matched studies, give matching criteria and number of exposed and unexposed<br><i>Case-control study</i> —For matched studies, give matching criteria and the number of controls per case                                                                                                                                                                                                                                                 | N/A                                                          |
| Variables                 | 7       | Clearly define all outcomes, exposures, predictors, potential confounders, and effect modifiers. Give diagnostic criteria, if applicable                                                                                                                                                                                                                                                                                                                               | Pg.6-8, line 140-173                                         |
| Data sources/ measurement | 8*      | For each variable of interest, give sources of data and details of methods of assessment (measurement). Describe comparability of assessment methods if there is more than one group                                                                                                                                                                                                                                                                                   | Pg.5-6, line 112-139                                         |
| Bias                      | 9       | Describe any efforts to address potential sources of bias                                                                                                                                                                                                                                                                                                                                                                                                              | Pg.6, line 125-218; Pg. 6, line 134-139; Pg. 7, line 161-162 |
| Study size                | 10      | Explain how the study size was arrived at                                                                                                                                                                                                                                                                                                                                                                                                                              | Pg.5, line 113-16                                            |

## STROBE Checklist

**Manuscript title:** Epidemiology and Liver Transplantation Burden of Primary Biliary Cholangitis in Canada: A Retrospective Cohort Study Using National Administrative Data

|                        |     |                                                                                                                                                                                                                    |                                                                                                                                                                                |
|------------------------|-----|--------------------------------------------------------------------------------------------------------------------------------------------------------------------------------------------------------------------|--------------------------------------------------------------------------------------------------------------------------------------------------------------------------------|
| Quantitative variables | 11  | Explain how quantitative variables were handled in the analyses. If applicable, describe which groupings were chosen and why                                                                                       | Pg.6,<br>line 128-132                                                                                                                                                          |
| Statistical methods    | 12  | (a) Describe all statistical methods, including those used to control for confounding                                                                                                                              | Pg.7-8,<br>line 156-173                                                                                                                                                        |
|                        |     | (b) Describe any methods used to examine subgroups and interactions                                                                                                                                                | N/A                                                                                                                                                                            |
|                        |     | (c) Explain how missing data were addressed                                                                                                                                                                        | Pg.6,<br>line 125-218                                                                                                                                                          |
|                        |     | (d) <i>Cohort study</i> —If applicable, explain how loss to follow-up was addressed                                                                                                                                | Pg.7,<br>line 160-161, 166-170                                                                                                                                                 |
|                        |     | <i>Case-control study</i> —If applicable, explain how matching of cases and controls was addressed<br><i>Cross-sectional study</i> —If applicable, describe analytical methods taking account of sampling strategy | 170                                                                                                                                                                            |
|                        |     | (e) Describe any sensitivity analyses                                                                                                                                                                              | N/A                                                                                                                                                                            |
| <b>Results</b>         |     |                                                                                                                                                                                                                    |                                                                                                                                                                                |
| Participants           | 13* | (a) Report numbers of individuals at each stage of study—eg numbers potentially eligible, examined for eligibility, confirmed eligible, included in the study, completing follow-up, and analysed                  | As per the Methods section, all patients in the study databases were included; missing data (e.g., MELD score) was not imputed; Number of censored patients are shown in Fig.5 |
|                        |     | (b) Give reasons for non-participation at each stage                                                                                                                                                               |                                                                                                                                                                                |
|                        |     | (c) Consider use of a flow diagram                                                                                                                                                                                 |                                                                                                                                                                                |
| Descriptive data       | 14* | (a) Give characteristics of study participants (eg demographic, clinical, social) and information on exposures and potential confounders                                                                           | Pg.8-9,<br>line 188-196                                                                                                                                                        |
|                        |     | (b) Indicate number of participants with missing data for each variable of interest                                                                                                                                | STROBE attachment,<br>Table 1                                                                                                                                                  |
|                        |     | (c) <i>Cohort study</i> —Summarise follow-up time (eg, average and total amount)                                                                                                                                   | Pg.10,<br>line 218-220                                                                                                                                                         |
| Outcome data           | 15* | <i>Cohort study</i> —Report numbers of outcome events or summary measures over time                                                                                                                                | Pg.8,<br>line 176-177; Pg. 9<br>line 198-199                                                                                                                                   |
|                        |     | <i>Case-control study</i> —Report numbers in each exposure category, or summary measures of exposure                                                                                                               | N/A                                                                                                                                                                            |
|                        |     | <i>Cross-sectional study</i> —Report numbers of outcome events or summary measures                                                                                                                                 | N/A                                                                                                                                                                            |
| Main results           | 16  | (a) Give unadjusted estimates and, if applicable, confounder-adjusted estimates and their precision (eg, 95% confidence                                                                                            | STROBE attachment,<br>Table 2                                                                                                                                                  |

## STROBE Checklist

**Manuscript title:** Epidemiology and Liver Transplantation Burden of Primary Biliary Cholangitis in Canada: A Retrospective Cohort Study Using National Administrative Data

|                          |    |                                                                                                                                                                            |                                                |
|--------------------------|----|----------------------------------------------------------------------------------------------------------------------------------------------------------------------------|------------------------------------------------|
|                          |    | interval). Make clear which confounders were adjusted for and why they were included                                                                                       |                                                |
|                          |    | (b) Report category boundaries when continuous variables were categorized                                                                                                  | Pg.7,<br>line 151-154                          |
|                          |    | (c) If relevant, consider translating estimates of relative risk into absolute risk for a meaningful time period                                                           | N/A                                            |
| Other analyses           | 17 | Report other analyses done—eg analyses of subgroups and interactions, and sensitivity analyses                                                                             | N/A                                            |
| <b>Discussion</b>        |    |                                                                                                                                                                            |                                                |
| Key results              | 18 | Summarise key results with reference to study objectives                                                                                                                   | Pg.10-12,<br>Line 222-290                      |
| Limitations              | 19 | Discuss limitations of the study, taking into account sources of potential bias or imprecision. Discuss both direction and magnitude of any potential bias                 | Pg.12,<br>Line 273-284                         |
| Interpretation           | 20 | Give a cautious overall interpretation of results considering objectives, limitations, multiplicity of analyses, results from similar studies, and other relevant evidence | Pg.12,<br>Line 285-290                         |
| Generalisability         | 21 | Discuss the generalisability (external validity) of the study results                                                                                                      | Real-world validity:<br>Pg.11,<br>Line 251-261 |
| <b>Other information</b> |    |                                                                                                                                                                            |                                                |
| Funding                  | 22 | Give the source of funding and the role of the funders for the present study and, if applicable, for the original study on which the present article is based              | Pg.1-2,<br>Line 25-28                          |

\*Give information separately for cases and controls in case-control studies and, if applicable, for exposed and unexposed groups in cohort and cross-sectional studies.

**Note:** An Explanation and Elaboration article discusses each checklist item and gives methodological background and published examples of transparent reporting. The STROBE checklist is best used in conjunction with this article (freely available on the Websites of PLoS Medicine at <http://www.plosmedicine.org/>, Annals of Internal Medicine at <http://www.annals.org/>, and Epidemiology at <http://www.epidem.com/>). Information on the STROBE Initiative is available at [www.strobe-statement.org](http://www.strobe-statement.org).
